# Supplementary material for: Blood autoantibody and cytokine profiles predict response to anti-tumor necrosis factor therapy in rheumatoid arthritis
Source: Arthritis Res Ther. 2009 May 21;11(3):R76. doi: 10.1186/ar2706 (PMC2714123; doi:10.1186/ar2706)
Supplement: Additional data file 1 — Excel file containing a table that summarizes the clinical characteristics of the Japanese cohort, including co-medications. [file ar2706-S1.xls]

## Sheet: Sheet1
Additional file 1
sample			duration	CRP	ESR	RF	ACR response score		other medications (BL)
No.			of RA	BL	BL	BL	3months	6months	MTX (mg)	Pred dose
	age	sex	(month)	mg/dl	mm/hr		(%)	(%)	/week	(mg/d)	DMARD	NSAID
3943	55	F	60	7.5	79	1066	<20	<20	10	7		diclofenac sodium
3944	62	F	360	2.2	49	111.2	NA	<20	0	0	SSZ	diclofenac sodium
4043	70	F	151	0.1	11	135.5	20	<20	8	0	BU		INH300mg
4065	34	F	11	5.1	66	53.5	<20	<20	8	7.5		loxoprofen sodium
4126	56	F	196	2.1	58	437	<20	<20	0	7.5		diclofenac sodium
4233	71	F	240	0.8	65	39.9	<20	<20	8	0		ampiroxicam
4384	41	F	193	1.7	58	102.4	NA	<20	8	7.5		etodolac, loxoprofen sodium		Folic acid 5mg
4476	69	F	77	3.8	77	55.3	20	<20	10	0	BU	meloxicam	INH300mg
4778	54	F	210	2.39	69	32.9	50	<20	6	4				Folic acid 5mg
3942	45	F	111	1.5	32	28.8	50	70	0	0
3986	70	F	444	3.9	95	1675	70	70	0	5		meloxicam
4002	55	F	104	6.6	76	66.9	70	70	8	5		loxoprofen sodium	INH300mg	Folic acid 5mg
4026	45	F	193	0.3	16	14.9	50	70	8	0			INH300mg
4027	76	F	426	6.3	108	198.5	50	70	4	5		loxoprofen sodium	INH200mg	Folic acid 2.5mg
4073	39	F	211	1.1	37	66.2	NA	70	8	4				Folic acid 5mg
4093	24	F	26	0.2	19	23.2	70	70	0	0		meloxicam, etodolac
4122	71	M	52	1.8	35	108	70	70	0	0		loxoprofen sodium
4203	60	F	240	6.7	80	103.2	70	70	0	5		meloxicam
4311	61	F	80	2.4	52	545	70	70	8	2		diclofenac sodium		Folic acid 5mg
4863	25	F	22	4.04	50	31.3	20	70	8	7.5		diclofenac sodium
4900	62	F	16	4.99	120	49.1	20	70	8	0		meloxicam		Folic acid 5mg
Pred = prednisolone
SSZ = sulphasalazine
BL = Baseline
